# Supplementary material for: Merging and serving Ocean Observations: a description of Marine Data Aggregators
Source: Copernicus journal article supplement (doi:10.5194/sp-2024-23), 2024-09-27
Supplement: Supplementary file [file sp-2024-23-AC1-supplement.pdf]

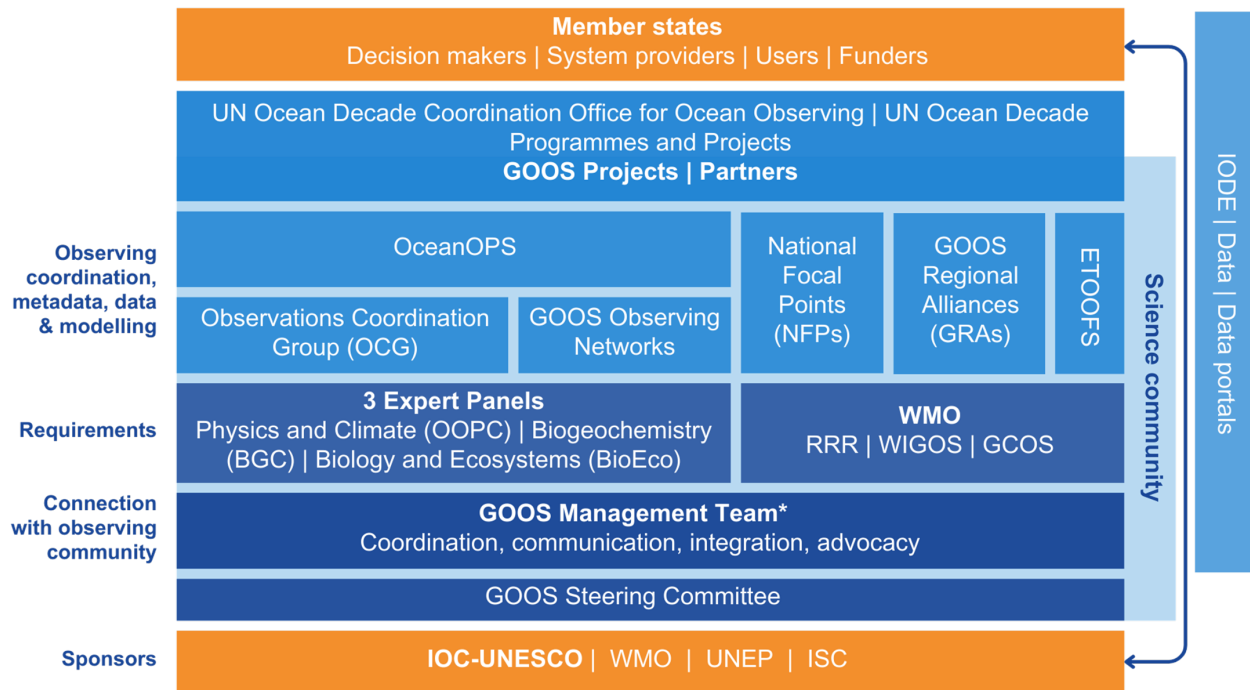

**Figure 1: GOOS framework**
